# Supplementary material
Source: PubMed Central journal article supplement (PMC7709211)
Supplement: attr-55-11-16_s02.pdf [file attr-55-11-16_s02.pdf]

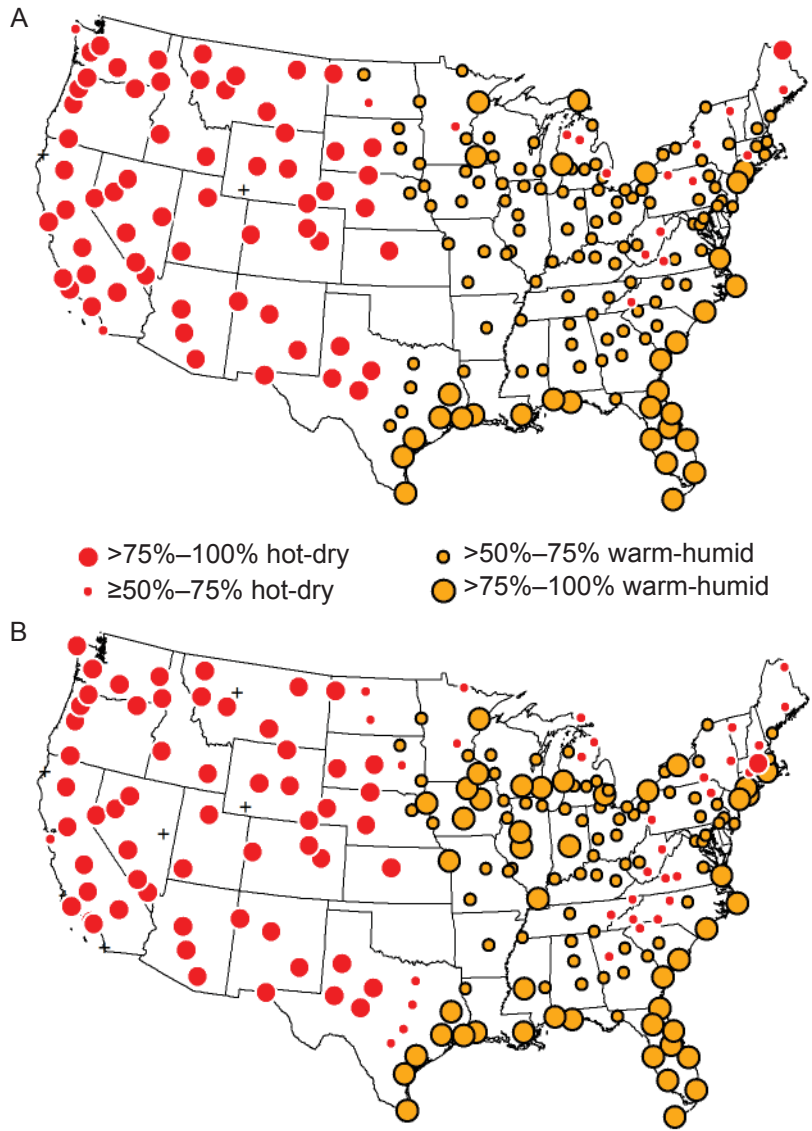

**Supplemental Figure 2.** Percentage of, A, 30.1°C and, B, 27.9°C wet-bulb globe temperatures classified as hot-dry or wet-humid.
